# Supplementary material
Source: PubMed Central journal article supplement (PMC2688544)
Supplement: E08-11-1104_1.pdf [file E08-11-1104_1.pdf]

**Table S1. Identification of putative p31-binding proteins**

| Size (kDa) | Proteins                                                                                                                                                                                                                                                                                                                                                                  |
|------------|---------------------------------------------------------------------------------------------------------------------------------------------------------------------------------------------------------------------------------------------------------------------------------------------------------------------------------------------------------------------------|
| ~250       | neuroblastoma-amplified protein, chromosome 14 ORF 170,<br>RNA polymerase II polypeptide A, ubiquitin specific protease 9                                                                                                                                                                                                                                                 |
| 110-130    | hnRNP U, Sec24C*, rho/rac GEF 2                                                                                                                                                                                                                                                                                                                                           |
| 90-100     | ZW10, Hsp90, RINT-1, E1B-55kDa-associated protein 5, ERdj5<br>PRP39 pre-mRNA processing factor 39 homolog                                                                                                                                                                                                                                                                 |
| ~80        | NSF, Sec23A*, DEAD box polypeptide 4                                                                                                                                                                                                                                                                                                                                      |
| ~70        | DEAD/H box polypeptide 3, DEAD box polypeptide 5, Hsp70,<br>fusion (involved in t(12;16) in malignant liposarcoma), Sly1,<br>influenza virus NS1A binding protein, hnRNP R, RNA binding<br>motif protein 14, polyA binding protein cytoplasmic 1                                                                                                                          |
| 50~70      | CGI-09 protein, myo-inositol 1-phosphate synthase A1, hnRNP K,<br>coactivator-associated Arg methyltransferase 1, P60 lymphocyte protein                                                                                                                                                                                                                                  |
| 35~45      | hnRNP D, interleukin enhancer binding factor 2, hnRNP F,<br>40S ribosomal protein SA, alpha 2 actin, TRK-fused gene,<br>TIA1 cytotoxic granule-associated RNA-binding protein like 1,<br>HMT1 hnRNP methyltransferase-like 2, hnRNP A2/B1, hnRNP H3,<br>hnRNP D-like, hnRNP A3, hnRNP AB, hnRNP A1, hnRNP A0,<br>AIF-homologous mitochondrion-associated inducer of death |
| 25~35      | p31, ribosomal protein S3, hypothetical protein FLJ40452                                                                                                                                                                                                                                                                                                                  |

\*No binding was observed when these proteins were co-expressed with p31.

## Figure S1

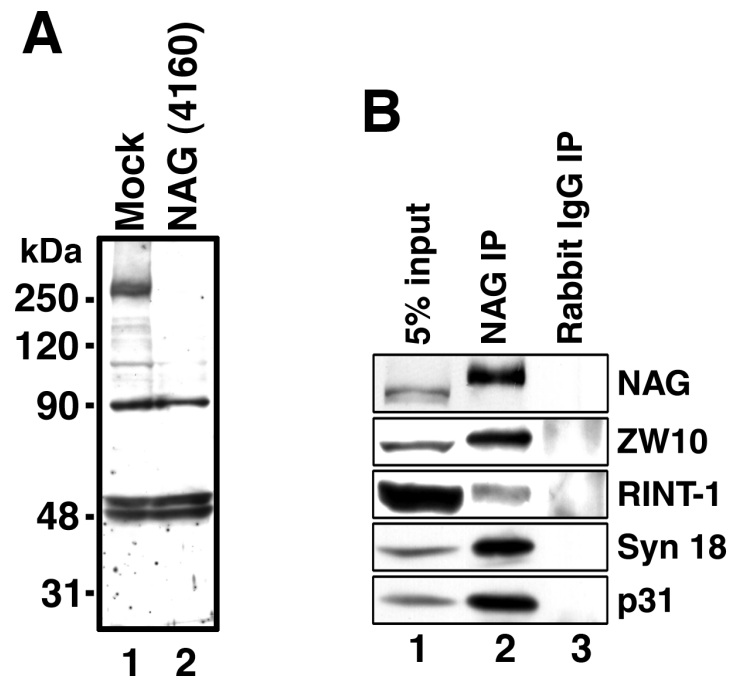

**Supplemental Figure 1.** Identification and immunoprecipitation of the NAG protein. (A) Lysates (10  $\mu$ g each) of mock-treated or NAG (4160)-transfected HeLa cells were subjected to SDS-PAGE and immunoblotted with an anti-NAG rabbit polyclonal antibody. (B) Triton X-100 extracts of 293T cells were immunoprecipitated with an antibody against NAG. The precipitated proteins were separated by SDS-PAGE and analyzed by immunoblotting with the indicated antibodies.

## Figure S2

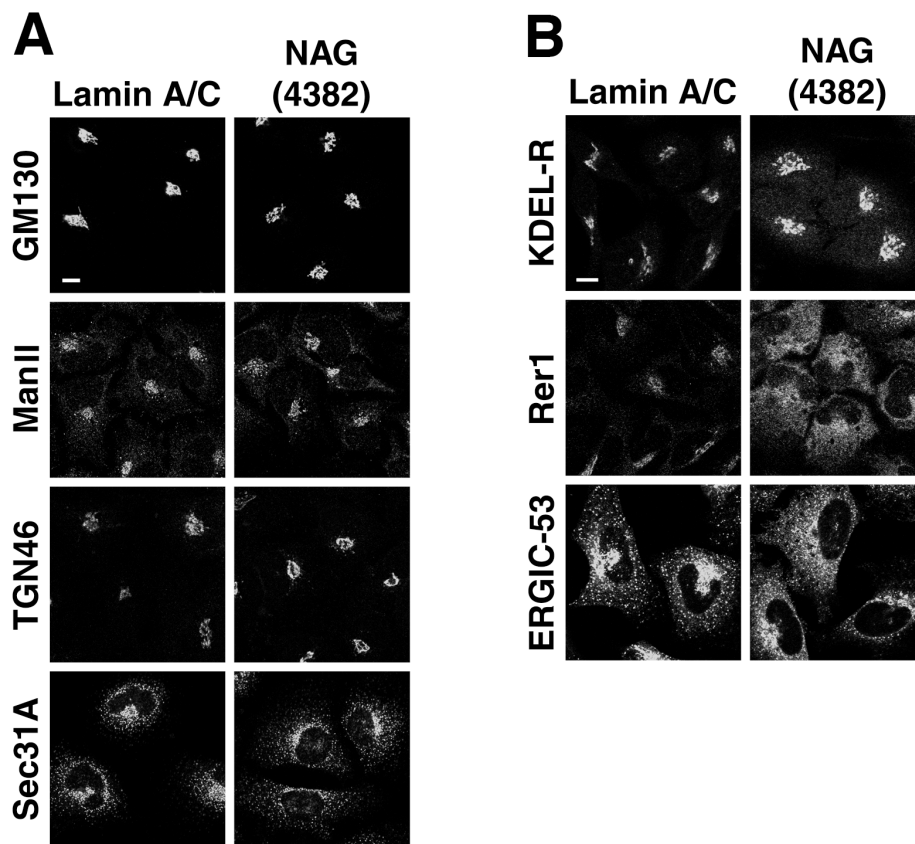

**Supplemental Figure 2.** NAG (4382) causes the same effect on the localization of organelle markers as does NAG (4160). HeLa cells were transfected with lamin A/C siRNA or NAG (4382). At 72 h after transfection, the cells were fixed and immunostained with the indicated antibodies. (A) Bars, 10  $\mu$ m.
